# Supplementary material for: Solventless metallation of low melting porphyrins synthesized by the water/microwave method
Source: Royal Society of Chemistry journal article supplement (doi:10.1039/c5ra11820d), 2015-01-01
Supplement: c5ra11820d1.pdf [file c5ra11820d1.pdf]

## Supplementary information for:

# Solventless Metallation of Low Melting Porphyrins Synthesised by the Water/Microwave Method

César A. Henriques, Sara M. A. Pinto, M. Pineiro, João Canotilho, M. Ermelinda S. Eusébio, Mariette M. Pereira and Mário J. F. Calvete

## 1. Experimental Section

**General procedure Water/MW method:** The mixture of pyrrole (9.8 mmol; 0.68 mL), aldehyde (or mixture of aldehydes) (9.8 mmol) and water (0.2 mL) were mixed in a 10 mL microwave vessel. If the aldehyde was a solid, ultrasound was applied to the closed vessel for 10 minutes. The mixture was subsequently subjected to microwave irradiation for 10 minutes at 200 °C and 300W initial power. After cooling, methyl acetate (~10 mL) was added and the resulting mixture was then washed with water (10 mL). The porphyrin isolated yields obtained either after column chromatography on silica gel using different mixtures of methyl acetate/n-hexane as eluent or recrystallisation.

### 1.1. 5-(4-hydroxyphenyl)-10,15,20-tris-(4-(2-ethyl-hexyloxy)phenyl)porphyrin (2)

#### Via MW-Water method<sup>1</sup>

Were used 0.299 g (2.45 mmol) of 4-hydroxybenzaldehyde and 1.72 g (7.35 mmol) of 4-(2-ethyl-hexyloxy)benzaldehyde). As eluent was used methyl acetate/n-hexane (1:3), to elute 5,10,15,20-(4-(2-ethyl-hexyloxy)phenyl porphyrin **3**, followed by methyl acetate to obtain 5-(4-hydroxyphenyl)-10,15,20-(4-(2-ethyl-hexyloxy)phenyl porphyrin **2** in 7% yield (192 mg). Data according to the literature.<sup>1</sup>

#### Via Adler-Longo method<sup>2</sup>

The condensation of the mixture of 4-hydroxybenzaldehyde (1.83 g, 0.015 mol), 4-(2-ethyl-hexyloxy)phenyl (10 mL, 0.045 mol) with 4.1 mL pyrrole (0.059 mol), in propionic acid (315 mL) was carried out of at 150°C (2h). The reaction was cooled till ~65°C and the reflux condenser was substituted by a distillation apparatus, for low pressure solvent removal. The solid product obtained was dissolved in dichloromethane (100 mL) and washed with saturated solution of sodium bicarbonate (3x 100 mL). The crude reaction mixture was purified by column chromatography with CH<sub>2</sub>Cl<sub>2</sub>:n-hexane (2:1) initially, to elute porphyrin **3**, followed by CH<sub>2</sub>Cl<sub>2</sub> as eluent. The porphyrin **2** was obtained with 8% (1.16 g) of yield.

#### Via Gonsalves-Pereira method<sup>3</sup>

The condensation of the mixture of 4-hydroxybenzaldehyde (1.83 g, 0.015 mol), 4-(2-ethyl-hexyloxy)benzaldehyde (10 mL, 0.045 mol) with 4.1 mL pyrrole (0.059 mol), in a mixture of acetic acid (210 mL) and nitrobenzene (105mL) was carried out of at 140 °C (1h). The reaction was cooled till ~65°C and the reflux condenser was substituted by a distillation apparatus, for low pressure solvent removal. Then, the crude reaction mixture was purified by column chromatography with CH<sub>2</sub>Cl<sub>2</sub>:n-hexane (2:1) initially,

to elute porphyrin **3** followed CH<sub>2</sub>Cl<sub>2</sub> as eluent. The porphyrin **2** was obtained with 8% (1.37 g) of yield.

#### Via Lindsey method<sup>4</sup>

Samples of 4-hydroxybenzaldehyde (0.455 g, 3.75 mmol), 4-(2-ethyl-hexyloxy)phenyl (2.58 mL, 11 mmol) and pyrrole (1.04 mL, 15 mmol) were dissolved in CH<sub>2</sub>Cl<sub>2</sub> (1L) at room temperature under inert atmosphere. Then, TFA (1 mL, 11 mmol) was added, and the mixture was stirred. After 1h, a solution of DDQ (2.5 g, 11 mmol) was added and reaction heated to 45 °C for 1 hour. In finally, the reaction mixture was neutralized with 20 mL triethylamine and the solvents were evaporated. The crude reaction mixture was dissolved in CH<sub>2</sub>Cl<sub>2</sub> (150 mL) and washed with 1 M NaOH solution (5 x 200 mL) to remove DDQ rests, dried with Na<sub>2</sub>SO<sub>4</sub>, evaporated and purified by column chromatography with CH<sub>2</sub>Cl<sub>2</sub>:n-hexane (2:1) initially, to elute porphyrin **3**, followed CH<sub>2</sub>Cl<sub>2</sub> as eluent. The porphyrin **2** was obtained with 10% (400 mg) of yield.

#### **1.1.1. Up-scaled synthesis of porphyrin 2, via MW-Water method**

Were used 1.2 g (9.8 mmol) of 4-hydroxybenzaldehyde and 6.9 g (29.4 mmol) of 4-(2-ethyl-hexyloxy)benzaldehyde) and 2.62 mL (39 mmol) of pyrrole dissolved in 1 mL deionized water, using a 35 mL MW vessel. Reaction and work-up proceeded as for general procedure. As eluent was used methyl acetate/n-hexane (1:3), to elute 5,10,15,20-(4-(2-ethyl-hexyloxy)phenyl porphyrin **3**, followed by methyl acetate to obtain 5-(4-hydroxyphenyl)-10,15,20-(4-(2-ethyl-hexyloxy)phenyl porphyrin **2** in 6.8% yield (765 mg).

#### **1.2. Meso-substituted symmetrical porphyrins (using MW/Water method)**

##### 5,10,15,20-(4-(2-ethyl-hexyloxy)phenyl porphyrin (3)

4-(2-ethyl-hexyloxy)benzaldehyde) was used (2.30 g, 9.8 mmol). Methyl acetate/n-hexane (1:3) was used as eluent for column chromatography. 5,10,15,20-(4-(2-ethyl-hexyloxy)phenyl porphyrin was obtained in 14% yield (389 mg). Data is according to the literature.<sup>1</sup>

##### 5,10,15,20-tetra(dodecyl)porphyrin (4)

*n*-Tridecanal (1.94g, 9.8 mmol) was used in this reaction. As eluent was used methyl acetate/n-hexane (1:3) and **4** was obtained in 11% yield (268 mg).

<sup>1</sup>H NMR (400 MHz, CDCl<sub>3</sub>, 25°C, TMS): δ = 9.45 (s,8H), 4.92 (t, J=8Hz, 8H), 2.57-2.47 (m, 8H), 1.86-1.77 (m,8H), 1.57-1.51 (m,8H), 1.31-1.21(m, 56H), 0.89 (t, J=8Hz, 12H), -2.63 (s, 2H). Data is according to the literature.<sup>5</sup>

##### 5,10,15,20-tetra(tridecyl)porphyrin (5)

*n*-Tetradecanal (2.08g, 9.8 mmol) was used in this reaction. As eluent was used methyl acetate/n-hexane (1:3) and **5** was obtained in 12% yield (292 mg).

<sup>1</sup>H NMR (400 MHz, CDCl<sub>3</sub>, 25°C, TMS): δ = 9.44 (s,8H), 4.91 (t, J=8Hz, 8H), 2.55-2.45 (m, 8H), 1.83-1.76 (m,8H), 1.69-1.63 (m,8H, 1.40-1.21 (m, 64H), 0.87 (t, J=8Hz, 12H), -2.65 (s, 2H). Data is according to the literature.<sup>6</sup>

### 1.3. Characterization of metalloporphyrins

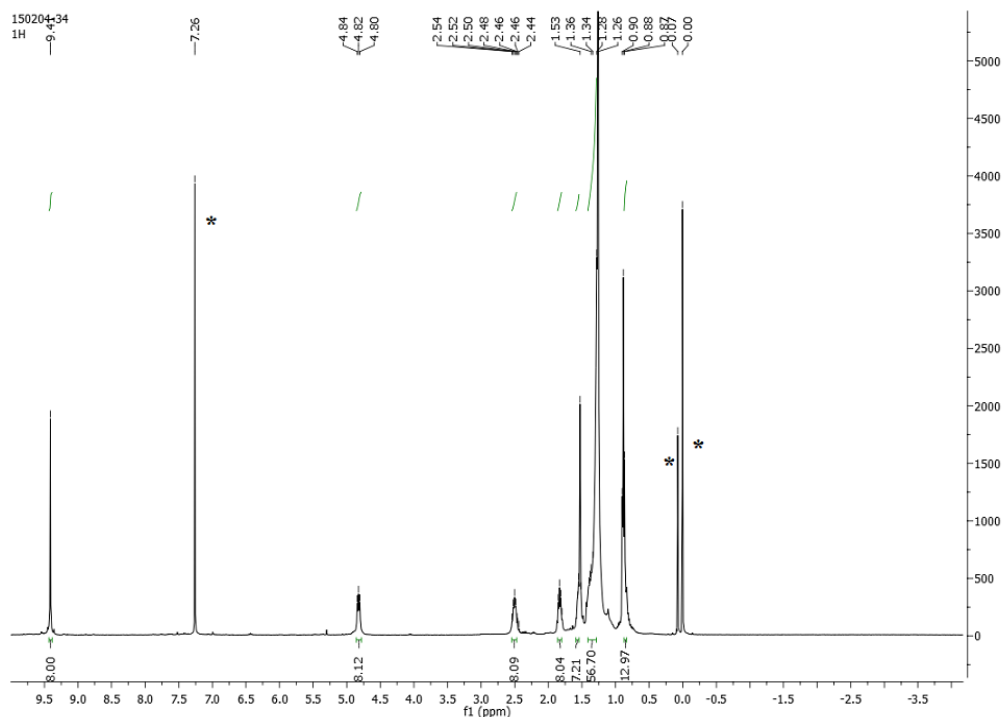

Fig. S11.  $^1\text{H-NMR}$  spectrum of 5,10,15,20-tetra(dodecyl)porphyrinato zinc(II) (**4a**). (\*-solvents)

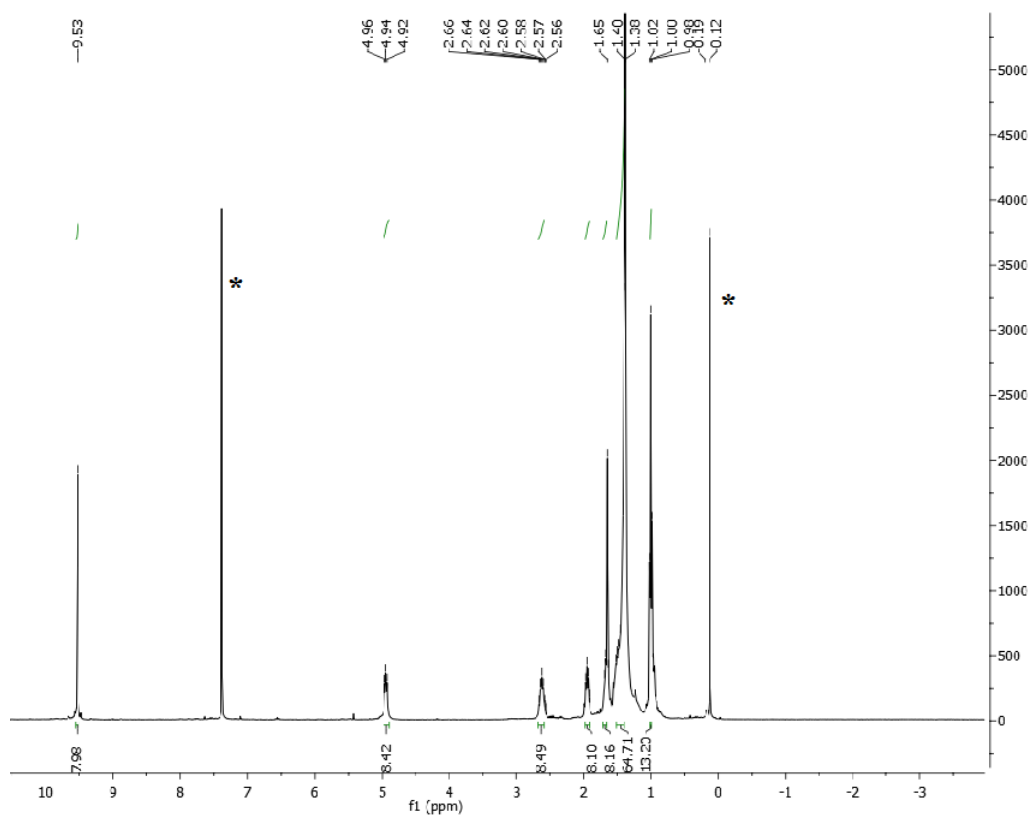

Fig. S12.  $^1\text{H-NMR}$  spectrum of 5,10,15,20-tetra(tridecyl)porphyrinato zinc(II) (**5<sup>a</sup>**). (\*-solvents)

## 2. Typical Microwave apparatus reaction report (Temperature, pressure and power vs time)

### Method Parameters

Name: cesar

Prestirring(mm:ss): 01:00

Type: Dynamic

| Stage | Temp(C) | Time(mm:ss) | Pressure(BAR) | Power(W) | PowerMAX | Stirring |
|-------|---------|-------------|---------------|----------|----------|----------|
| 1     | 200     | 10:00       | 20,7          | 300      | No       | High     |

### Graphs

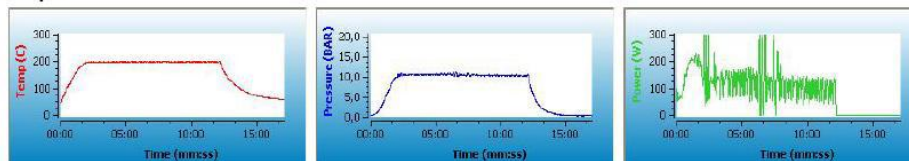

## 3. Calculation of sustainability factors (E Factor and EcoScale)

*Density of chemicals used for the calculation of residues (d = density)*

Propionic acid d= 990 g/L

Methanol d=792 g/L

Nitrobenzene d= 1200 g/L

Acetic acid d= 1050 g/L

Dichloromethane d= 1330 g/L

Chloroform d= 1489 g/L

n-Hexane d= 655 g/L

Water d= 1000g/L

Ethanol d= 789 g/L

Ethyl acetate d= 897 g/L

Triethylamine d= 725.5 g/L

Pyridine d= 982 g/L

Diethyl ether = 713.4 g/L

Saturated sodium acetate solution d= 1528 g/L

Saturated sodium bicarbonate solution d= 2200 g/L

DBU (1,8-Diazabicyclo[5.4.0]undec-7-ene) d= 1018 g/L

Butyl acetate d= 883 g/L

Petrol ether d= 640 g/L

[bmim][BF<sub>4</sub>] d=1210 g/L

DMF d= 948 g/L

Acetonitrile d= 786 g/L

1-bromo-2-ethylhexane d = 1086 g/L

### 3.1. Calculation of E Factors for the preparation of 4-(2-ethyl-hexyloxy) benzaldehyde

Conventional heating method

$E = (118 \text{ g acetonitrile} + 7.8 \text{ g acetonitrile} + 30 \text{ g silica} + 400 \text{ g dichloromethane})/9 \text{ g}$

$E = 62$

Microwave irradiation method

$$E = (0.78 \text{ g acetonitrile} + 1.56 \text{ g acetonitrile})/0.109 \text{ g}$$

$$E = 21$$

**3.2. Calculation of E Factors for the preparation of 4-(2-ethyl-hexyloxy) benzaldehyde**

| Conventional Method          |                |
|------------------------------|----------------|
| Category                     | Penalty Points |
| Yield                        | 2.5            |
| Price of reaction components | 3              |
| Safety                       | 10             |
| Technical Setup              | 0              |
| Temperature/Time             | 3              |
| Workup/Purification          | 10             |
| Total                        | 28.5           |
| <b>EcoScale (100-Total)</b>  | <b>71.5</b>    |

| Microwave Method             |                |
|------------------------------|----------------|
| Category                     | Penalty Points |
| Yield                        | 1.7            |
| Price of reaction components | 3              |
| Safety                       | 10             |
| Technical Setup              | 1              |
| Temperature/Time             | 2              |
| Workup/Purification          | 0              |
| Total                        | 16.7           |
| <b>EcoScale (100-Total)</b>  | <b>83.3</b>    |

**3.3. Calculation of E Factors for the preparation of 5-(4-hydroxyphenyl)-10,15,20-tri-(4-(2-ethyl-hexyloxy)phenyl)porphyrin 2**

Water/Microwave method

$$E = (0.2 \text{ g water} + 10 \text{ g methyl acetate} + 10 \text{ g water} + 30 \text{ g silica gel} + 35 \text{ g n-hexane} + 60 \text{ g methyl acetate} + 60 \text{ g methyl acetate})/0.192 \text{ g}$$

$$E = 1069$$

Adler-Longo method

$$E = (312 \text{ g propionic acid} + 133 \text{ g dichloromethane} + 300 \text{ g bicarbonate} + 300 \text{ g silica} + 800 \text{ g dichloromethane} + 200 \text{ g n-hexane} + 500 \text{ g dichloromethane})/1.16 \text{ g}$$

$$E = 2193$$

Gonsalves-Pereira method

$$E = (250 \text{ g nitrobenzene} + 110 \text{ g acetic acid} + 850 \text{ g dichloromethane} + 300 \text{ g silica} + 220 \text{ g n-hexane} + 550 \text{ g dichloromethane})/1.37 \text{ g}$$

$$E = 1664$$

Lindsey method

$$E = (1330 \text{ g dichloromethane} + 1.4 \text{ g TFA} + 2.5 \text{ g DDQ} + 15 \text{ g triethylamine} + 1000 \text{ g NaOH solution, 3 g Na}_2\text{SO}_4 + 150 \text{ g silica} + 532 \text{ g dichloromethane} + 82 \text{ g n-hexane} + 465 \text{ g dichloromethane})/0.4 \text{ g}$$

$$E = 8950$$

### 3.4. Calculation of EcoScale values for the preparation of 5-(4-hydroxyphenyl)-10,15,20-tris-(4-(2-ethyl-hexyloxy)phenyl)porphyrin 2

| MW-Water Method              |                |
|------------------------------|----------------|
| Category                     | Penalty Points |
| Yield                        | 46.5           |
| Price of reaction components | 3              |
| Safety                       | 25             |
| Technical Setup              | 1              |
| Temperature/Time             | 3              |
| Workup/Purification          | 12             |
| Total                        | 80.5           |
| <b>EcoScale (100-Total)</b>  | <b>9.5</b>     |

| Adler-Longo Method           |                |
|------------------------------|----------------|
| Category                     | Penalty Points |
| Yield                        | 46             |
| Price of reaction components | 8              |
| Safety                       | 30             |
| Technical Setup              | 1              |
| Temperature/Time             | 3              |
| Workup/Purification          | 13             |
| Total                        | 101            |
| <b>EcoScale (100-Total)</b>  | <b>-1</b>      |

| Gonsalves-Pereira Method     |                |
|------------------------------|----------------|
| Category                     | Penalty Points |
| Yield                        | 46             |
| Price of reaction components | 8              |
| Safety                       | 30             |
| Technical Setup              | 1              |
| Temperature/Time             | 3              |
| Workup/Purification          | 15             |
| Total                        | 104            |
| <b>EcoScale (100-Total)</b>  | <b>-4</b>      |

| Lindsey Method               |                |
|------------------------------|----------------|
| Category                     | Penalty Points |
| Yield                        | 44.5           |
| Price of reaction components | 18             |
| Safety                       | 50             |
| Technical Setup              | 1              |
| Temperature/Time             | 3              |
| Workup/Purification          | 13             |
| Total                        | 129.5          |
| <b>EcoScale (100-Total)</b>  | <b>-29.5</b>   |

### 3.5. EHS classification Table

| Selected substance | Vol. (m <sup>3</sup> ) | Safety       |                |                | Health       |        |                | Environment |          |            |
|--------------------|------------------------|--------------|----------------|----------------|--------------|--------|----------------|-------------|----------|------------|
|                    |                        | Release pot. | Fire/explosion | React./Decomp. | Acute toxic. | Irrit. | Chronic toxic. | Persistence | Air haz. | Water haz. |
| Acetic acid        | 1                      | 0.46         | 0.93           | 0.00           | 0.72         | 1.00   | 0.52           | 0.23        | 0.52     | 0.13       |
| Dichloromethane    | 1                      | 0.95         | 1.00           | 0.00           | 0.34         | 0.00   | 0.40           | 0.77        | 0.40     | 0.50       |
| Nitrobenzene       | 1                      | 0.10         | 0.69           | 0.00           | 0.49         | 0.39   | 0.66           | 0.54        | 0.66     | 0.35       |
| Propionic acid     | 1                      | 0.33         | 0.86           | 0.00           | 0.63         | 0.88   | 0.50           | 0.28        | 0.50     | 0.00       |

## 4. Calculation of sustainability factors for the preparation of metalloporphyrins

### 4.1. Calculation of E Factors

*Solventless method (this work)*

$$E = (0.9 \text{ g methyl acetate} + 2 \text{ g water})/0.0103 \text{ g}$$

$$E = 281$$

Chloroform/methanol method

$E = (45 \text{ g chloroform} + 4 \text{ g methanol} + 5 \text{ g Na}_2\text{SO}_4 + 50 \text{ g water} + 20 \text{ g silica gel} + 150 \text{ g chloroform})/0.135 \text{ g}$

E = 2030

DMF method

$E = (1500 \text{ g DMF} + 4000 \text{ g water})/11.4 \text{ g}$

E = 482

Pyridine method

$E = (98.2 \text{ g pyridine} + 713 \text{ g diethyl ether} + 2292 \text{ sodium acetate solution} + 2854 \text{ g diethyl ether} + 2000 \text{ g 0.1M HCl} + 2200 \text{ g NaHCO}_3 + 1000 \text{ g water})/0.85 \text{ g}$

E = 13126

DBU/Microwave method

$E = (5 \text{ g DBU} + 8 \text{ g ethanol} + 9 \text{ g butyl acetate} + 6 \text{ g petrol ether} + 10 \text{ g methanol} + 30 \text{ g Al}_2\text{O}_3 + 200 \text{ g chloroform})/0.6 \text{ g}$

E = 447

Ionic liquid/Microwave method

$E = (1.21 \text{ g ionic liquid} + 15 \text{ g ethyl acetate} + 10 \text{ g silica gel} + 75 \text{ g dichloromethane})/0.006 \text{ g}$

E = 16868

DMF/Microwave method

$E = (5 \text{ g DMF} + 50 \text{ g water} + 50 \text{ g water})/0.105 \text{ g}$

E = 1000

#### 4.2. Calculation of EcoScale values

| <b>Solventless method (this work)</b> |                |
|---------------------------------------|----------------|
| Category                              | Penalty Points |
| Yield                                 | 1              |
| Price of reaction components          | 3              |
| Safety                                | 10             |
| Technical Setup                       | 1              |
| Temperature/Time                      | 2              |
| Workup/Purification                   | 1              |
| Total                                 | 18             |
| EcoScale (100-Total)                  | <b>82</b>      |

| <b>Chloroform/methanol method</b> |                |
|-----------------------------------|----------------|
| Category                          | Penalty Points |
| Yield                             | 3              |
| Price of reaction components      | 3              |
| Safety                            | 20             |
| Technical Setup                   | 0              |
| Temperature/Time                  | 3              |
| Workup/Purification               | 14             |
| Total                             | 43             |
| EcoScale (100-Total)              | <b>57</b>      |

| <b>DMF method</b>            |                |
|------------------------------|----------------|
| Category                     | Penalty Points |
| Yield                        | 3              |
| Price of reaction components | 5              |
| Safety                       | 20             |
| Technical Setup              | 0              |
| Temperature/Time             | 2              |
| Workup/Purification          | 14             |
| Total                        | 44             |
| EcoScale (100-Total)         | <b>56</b>      |

| <b>Pyridine method</b>       |                |
|------------------------------|----------------|
| Category                     | Penalty Points |
| Yield                        | 2              |
| Price of reaction components | 5              |
| Safety                       | 25             |
| Technical Setup              | 0              |
| Temperature/Time             | 8              |
| Workup/Purification          | 1              |
| Total                        | 41             |
| EcoScale (100-Total)         | <b>59</b>      |

| <b>DBU/Microwave method</b>  |                |
|------------------------------|----------------|
| Category                     | Penalty Points |
| Yield                        | 17.5           |
| Price of reaction components | 5              |
| Safety                       | 15             |
| Technical Setup              | 1              |
| Temperature/Time             | 2              |
| Workup/Purification          | 11             |
| Total                        | 51.5           |
| EcoScale (100-Total)         | <b>48.5</b>    |

| <b>Ionic liquid/Microwave method</b> |                |
|--------------------------------------|----------------|
| Category                             | Penalty Points |
| Yield                                | 2              |
| Price of reaction components         | 5              |
| Safety                               | 10             |
| Technical Setup                      | 1              |
| Temperature/Time                     | 2              |
| Workup/Purification                  | 13             |
| Total                                | 33             |
| EcoScale (100-Total)                 | <b>67</b>      |

| <b>DMF/Microwave method</b>  |                |
|------------------------------|----------------|
| Category                     | Penalty Points |
| Yield                        | 2.5            |
| Price of reaction components | 5              |
| Safety                       | 15             |
| Technical Setup              | 1              |
| Temperature/Time             | 2              |
| Workup/Purification          | 13             |
| Total                        | 38.5           |
| EcoScale (100-Total)         | <b>61.5</b>    |



## 5. Thermomicroscopy

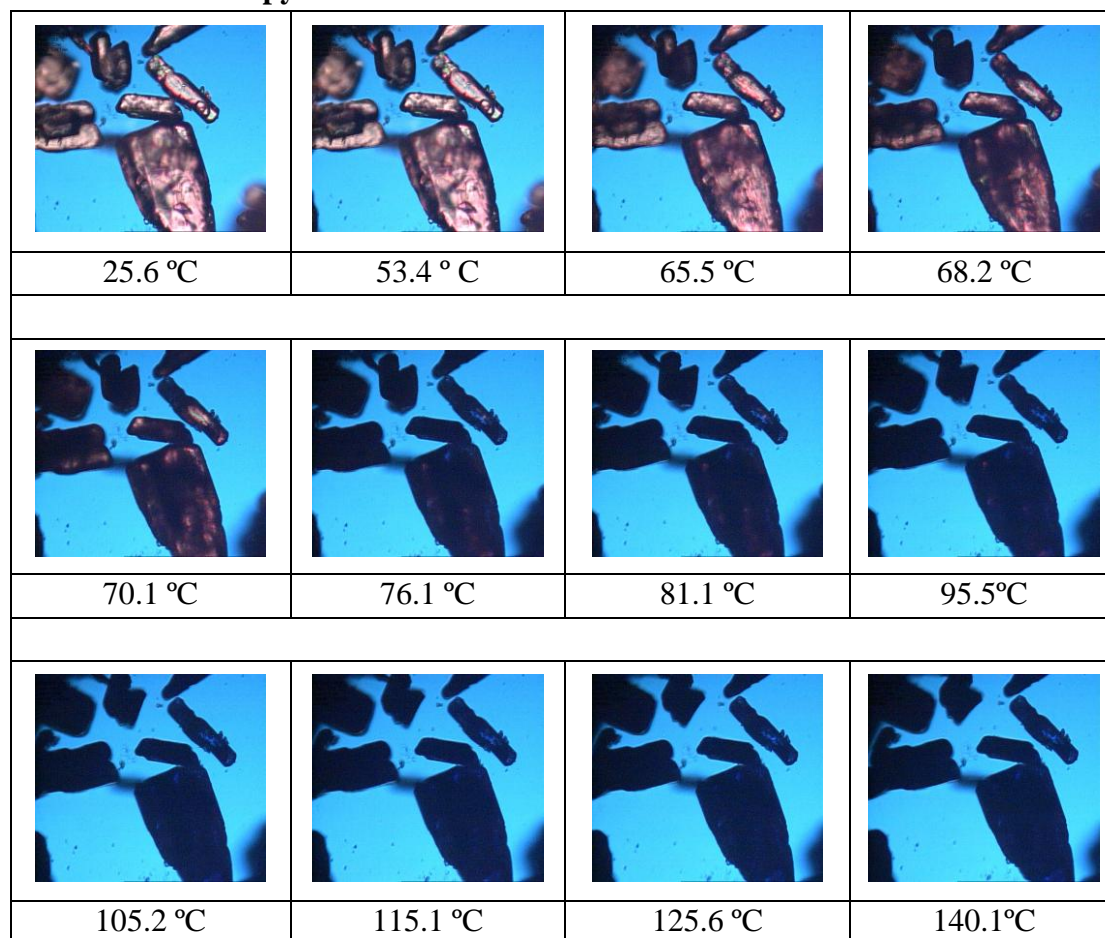

**Fig. SI3-** Polarized light thermomicroscopy images obtained in a heating run cobalt (II) acetate tetrahydrate (5 equivalent) mixture. Magnification 200x;  $\beta = 10^\circ\text{C min}^{-1}$ .

- 
- 1 C. A. Henriques, S. M. A. Pinto, G. L. B. Aquino, M. Pineiro, Mário J. F. Calvete and M. M. Pereira, *ChemSusChem*, 2014, **7**, 2821.
  - 2 A. D. Adler, F. R. Longo and W. Shergalis, *J. Am. Chem. Soc.*, 1964, **86**, 3145.
  - 3 R. A. W. Johnstone, M. L. P. G. Nunes, M. M. Pereira, A. M. D. R. Gonsalves and A. C. Serra, *Heterocycles*, 1996, **43**, 1423.
  - 4 J. S. Lindsey, I. C. Schreiman, H. C. Hsu, P. C. Kearney and A. M. Marguerettaz, *J. Org. Chem.* 1987, **52**, 827.
  - 5 N. Katsonis, J. Vicario, T. Kudernac, J. Visser, M. M. Pollard and B. L. Feringa, *J. Am. Chem. Soc.*, 2006, **128**, 15537.
  - 6 C. A. Henriques, N. P.F. Gonçalves, A. R. Abreu, M. J. F. Calvete and M. M. Pereira, *J. Porphyrins Phthalocyanines*, 2012, **16**, 290.
